# Supplementary material
Source: PubMed Central journal article supplement (PMC5832044)
Supplement: NIHMS944806-supplement-Suppl_Methods.pdf [file NIHMS944806-supplement-Suppl_Methods.pdf]

# 1 Supplementary material

2

## 3 Data source

4 All analyses were performed on previously published data. 16S rRNA gene abundance data from 2553  
5 samples, comprising 1266 oral, 187 stool, 836 skin and 264 vaginal, originating from the Human  
6 Microbiome Project (HMP)<sup>1</sup> were downloaded from their web resource (<http://www.hmpdacc.org/>). Of  
7 these, 172 had less than 1000 reads and were discarded from future analysis. An additional 139 stool  
8 metagenomic shotgun sequenced samples were downloaded from the same location. Additional  
9 metagenomic shotgun sequencing data originate from samples (368 Chinese samples and 278 samples  
10 from the MetaHIT project) described in Qin et al. (2012) and Le Chatelier et al. (2014), respectively.  
11 Three additional samples from the US were used, which are described in Schloissnig et al. (2013).

12 Data, together with code for generating the main figures can be found at:  
13 [https://hub.docker.com/r/costeapaul/enterotype\\_figures/](https://hub.docker.com/r/costeapaul/enterotype_figures/). Instructions for pulling and running the  
14 docker can also be found there.

## 15 *Taxonomic and functional analysis*

16 For 16S rRNA gene-based taxonomic composition analysis, we used operational taxonomic unit (OTU) or  
17 genus level relative abundances. Genus level abundance matrices were calculated by adding relative  
18 abundances of all taxonomically annotated OTUs. OTUs not annotated at genus level are considered  
19 “unclassified” and their relative abundances were agglomerated into that category.

20 For cross-study analyses, shotgun sequencing reads were mapped to a database of selected single copy  
21 phylogenetic marker genes (mOTU.v1.padded)<sup>2</sup> and summarized into species-level (mOTU) and genus-  
22 level relative abundances. Functional profiles of clusters of orthologous groups (COGs) and KEGG  
23 orthology groups (KO), including both those of eukaryotic and bacterial origin, for MetaHIT, Chinese, and  
24 HMP samples were computed using MOCAT<sup>3</sup> by mapping shotgun sequencing reads to an annotated  
25 reference gene catalogue as described in Voigt et al.<sup>4</sup> COG category abundances were calculated by  
26 summing the abundance of the respective COGs belonging to each category per sample, excluding  
27 NOGs.

28 Weighted and unweighted UniFrac distances were downloaded from the HMP web resource  
29 (<http://www.hmpdacc.org/>). Jensen-Shannon distances were computed on genus level relative  
30 abundance matrices, as described in the enterotyping tutorial  
31 (<http://enterotype.embl.de/enterotypes.html>).

32 For determining the optimal number of clusters on all data matrices, three different measures were  
33 used from the R fpc package<sup>5</sup> (version 2.1.9). The Calinski-Harabasz index<sup>6</sup> and the silhouette index<sup>7</sup> of a  
34 given distance matrix and a set number of clusters were computed using the function *pamk* with default  
35 parameters. The prediction strength<sup>8</sup> was calculated with a modified version of the *prediction.strength*  
36 function, allowing a distance matrix as a parameter, with the dataset being randomized 50 times. For all

37 the different measures, we varied the number of clusters between two and ten and considered the  
38 cluster number with the highest value for each measure to be the optimal one.

### 39 *Ordination*

40 Visualization of distance matrices was performed using unsupervised ordination methods. Principal  
41 coordinate analysis was performed with the R *ade4* package (version 1.6.2), using the *dudi.pco* function.

42 Parallel to each pair of enterotypes, we plotted the abundances of selected genera and functional  
43 categories (Fig. 3). For each combination, we performed principal component analysis on the 2-  
44 dimensional PCoA coordinates, to identify the axis that explains the greatest variation between  
45 enterotypes (i.e. the first eigenvector). This component forms the x-axis for the distributional plots.  
46 Subsequently, we log transformed abundance of genera/ functions, then scaled and centered them. The  
47 plotted line is a smoothed spline fitted to these transformed abundances, using the R base function  
48 *smooth.spline*. To test for significant bimodal distribution of feature abundance, Hartigan's dip test  
49 statistic from R package *diptest* was used.

### 50 *Feature significance testing*

51 Univariate testing for differential abundances of taxonomic and functional features between two or  
52 more groups was tested using a Wilcoxon-Rank Sum test or Kruskal-Wallis test (p-value), respectively,  
53 corrected for multiple testing using the Benjamini-Hochberg false discovery rate (q- value). COGs and  
54 KOs occurring in less than four samples or with an average normalized count abundance < 30 across  
55 were excluded from the univariate analysis.

### 56 *Diversity analysis*

57 Richness and Shannon diversity index for taxonomic and functional features, mOTU and OTU were  
58 calculated after rarefaction of matrices to 3,000 and 5,000, units per sample, respectively, using the  
59 *vegan* R package. Rarefactions of COG, KO and gene matrices were done using *rtk*<sup>9</sup> with a per sample  
60 rarefaction depth of 6,900,000. In total we performed 30 repetitions, in each of which we measured the  
61 richness and Shannon diversity metrics within a rarefaction. The median value of these was taken as the  
62 respective richness/ diversity measurement for each sample. These thresholds were chosen to include  
63 most samples. Diversity differences were plotted as boxplots (Suppl. Fig. 7 and 8), with boxes defined as  
64 25<sup>th</sup> and 75<sup>th</sup> quantiles, and whiskers by 1.5 \* interquartile range.

### 65 *Parameter-dependence of clustering*

66 Clustering algorithms have been developed and employed for nearly 100 years (e.g. Driver and Kroeber  
67 1932) and have more recently been applied to analyze microbial compositions, especially those of the  
68 human gut. However, it is challenging to determine whether there are actual clusters present, and if so,  
69 how many? A number of clustering optimality measures, as well as distance measures were employed  
70 for determining the number of microbial clusters that may be present in the human gut microbiota. To  
71 describe inter-sample differences, most studies use a combination of weighted and unweighted UniFrac  
72 distances or Jensen-Shannon distance (JSD) (Suppl. Table 1). To determine the optimal number of  
73 clusters in the space described by the distance measure, the CH-index<sup>6</sup>, silhouette index<sup>7</sup> and prediction  
74 strength<sup>8</sup> are commonly used.

75 Different distance metrics will give a different weight to community features. For example, the UniFrac  
76 distance<sup>11</sup>, be it weighted (taking abundance into account) or unweighted (presence-absence only), is  
77 based on the importance of phylogenetic distance between the components of the community. In  
78 contrast, the JSD distance does not take phylogenetic information into account, and measures the  
79 mutual information shared between two samples. For both weighted UniFrac and Jensen-Shannon, the  
80 underlying hypothesis is that variation in highly abundant members is the most relevant feature for  
81 describing similarities. The hypothesis of unweighted analysis is that community membership is the  
82 most important feature. While these distances are conceptually very distinct, they may result in the  
83 same outcome, though they exhibit quantitatively and qualitatively different properties. Another  
84 property worth considering is the absolute numbers of microbes in any given sample; it may be that  
85 observed fluctuations in composition poorly reflect the actual cell counts of the members, as the total  
86 amount varies considerably. This may constitute a further confounder when trying to disentangle  
87 compositional properties.

88 Within the Human Microbiome Project (HMP) dataset, 2910 samples are available from a range of  
89 human body sites<sup>4</sup>. We used this dataset to benchmark the aforementioned distances and optimality  
90 criteria, based on the assumption that human body-sites are inhabited by different microbial  
91 populations and that their separation should be clear (Fig. 1). The PCoA projections of the distance  
92 space into two dimensions shows that the largest part of the variation does not separate the body sites  
93 properly, except in the case of the JSD distance on genus level (Suppl. Fig. 4A). This metric and weighted  
94 UniFrac both recovered the four expected clusters in conjunction with PS or Silhouette index (Suppl. Fig.  
95 4B). However, even when recovered, the separation appears not to be very strong, with silhouette  
96 values being low (0.4 at best). Since often three or less clusters are chosen to be the optimal cluster  
97 number, we conclude that the clustering approach may be underpowered.

#### 98 [Cross-study enterotype comparison](#)

99 Comparability of the structure across multiple datasets is a necessary characteristic of the enterotype  
100 concept. However, although similar genera were reported as being most abundant in gut stratifications  
101 (Suppl. Table 1), this does not automatically imply similar communities or structure. To test the  
102 assumption of comparability, we used three unrelated large datasets, with different sampling  
103 procedures (US HMP<sup>1</sup>, Chinese diabetes type 2 study<sup>12</sup>, European MetaHIT consortium<sup>13</sup>) and clustered  
104 these with the PAM clustering algorithm on a JSD distance at genus level<sup>14</sup>. The obtained clusters had an  
105 overrepresentation of *Prevotella*, *Bacteroides* or Firmicutes (the latter represented by *Ruminococcus*,  
106 *Eubacterium* and *Subdoligranulum* respectively), as expected.

107 Although we do not exclude alternative scenarios (see Fig. 2), we first trained a LASSO logistic regression  
108 classifier<sup>15</sup> to recover the three enterotypes within the MetaHIT samples. This was then used to classify  
109 samples from the other two studies. The respective ROC-AUC was high (Suppl. Fig. 11), meaning that the  
110 classifier and unsupervised clustering mostly assigned the same cluster memberships to samples. One  
111 difference is that the classifier can be used on any arbitrarily small dataset. This approach could also be  
112 expanded to classify single samples based on other machine learning techniques, e.g. a trained DMM  
113 model.

114 Furthermore, if enterotypes reflect community compositions and not just differences in the driver  
115 species, i.e. are reflecting different ecological networks, we expect the classification to remain pertinent  
116 after removing *Bacteroides* and *Prevotella* from the data. Indeed, although with lower accuracy than  
117 when including these two taxa, the classification still captures the initial enterotypes in all datasets.

118 Further, using the abundance of gene families within each respective enterotype, the prediction of  
119 enterotype state is even stronger in cross validation than when using taxa abundances (Suppl. Fig 11).  
120 For this analysis, we used only commonly represented functional categories (i.e., COG's that have  
121 representative genes in at least five of the 50 most abundant genera), ensuring that the classifier does  
122 not exploit functional categories which are restricted to taxonomic subgroups.

### 123 Determining if samples are within enterotype space

124 Using the HMP dataset<sup>1</sup>, we compute the distance between all stool samples using a genus summarized  
125 OTU table. This allows us to define the expected distance distribution of stool samples. For any novel  
126 sample, we compute the distance to all stool samples in the HMP data and consider it to be in the  
127 enterotyping space if its average distance is within one standard deviation of the stool distance  
128 distribution. Using this approach, we correctly identify western-like stool sample and reject all other  
129 body-site samples as not being in the enterotyping space. Furthermore, we also correctly classify infant  
130 samples as being outside the enterotyping space (data not shown).

131

132 **Supplementary Table 1:** Microbial community studies researching the presence of enterotypes (ET).

133 Abbreviations: F=ET F (Firmicutes enriched), B=ET B (Bacteroides enriched), P=ET P (Prevotella enriched),

134 CH= Calinski-Harabasz pseudo F-statistic, SIL= Silhouette internal cluster optimality criterion.

| Study | Year | Technology                         | ET reported                                                                              | Optimal number                     | Cluster | Notes                                          |
|-------|------|------------------------------------|------------------------------------------------------------------------------------------|------------------------------------|---------|------------------------------------------------|
| 14    | 2011 | 454 rRNA, illumina WGS, Sanger WGS | B, F, P                                                                                  | CH (3)                             |         | First study to show ET's                       |
| 16    | 2011 | Sanger rRNA                        | B, F, P                                                                                  | visual                             |         | clone library                                  |
| 17    | 2011 | 454 rRNA                           | (F+B), P                                                                                 | CH (3), SIL (2)                    |         | Diet relation to ET's                          |
| 18    | 2012 | 454 rRNA                           | B, F, P                                                                                  | <sup>19</sup> (3), SIL (2)         |         | Species network based ET identification        |
| 20    | 2012 | 454 rRNA                           | P, (F+B), <i>Bifidobacteria</i>                                                          | SIL (2)                            |         | Includes children that form a separate cluster |
| 21    | 2012 | 454 rRNA                           | gradient                                                                                 | visual                             |         | Analysis not based on clustering, HMP          |
| 22    | 2013 | 454 rRNA, illumina WGS             | various                                                                                  | SIL(2), CH(3) (rDNA); 2 (WGS)      |         | Extensive testing of methodology, HMP          |
| 23,24 | 2012 |                                    | P, B, <i>Ruminococcus</i> , <i>Oscillibacter</i> , <i>Alistipes</i> , <i>Odoribacter</i> | CAGs (6), SIL(2), CH(2)            |         | co-abundance groups                            |
| 12    | 2012 | illumina WGS                       | B, F, P                                                                                  | SIL (3)                            |         |                                                |
| 25    | 2012 | illumina sg                        | B, F, P                                                                                  | CH (3), SIL (2)                    |         | Atherosclerosis associated to ET F             |
| 26    | 2012 | Sanger rRNA                        | Similar to F, P, B, F2                                                                   | Dirichlet Multinomial Mixtures (4) |         |                                                |
| 27    | 2012 | illumina rRNA                      | B, F, P                                                                                  | CH (3), SIL(2/3)                   |         | Chimpanzee                                     |
| 28    | 2013 | 454 rRNA                           | B, F, P                                                                                  | <sup>26</sup> (3)                  |         | Association of ET P to CD risk allele          |
| 29    | 2013 | 454 rRNA                           | B, F, P                                                                                  | Based on composition               |         | obesity and NASH in adolescents                |
| 30    | 2013 | illumina rRNA                      | F, B                                                                                     | CH (2), SIL (2)                    |         | Mouse; ET B shows links to inflammation        |
| 31    | 2013 | 454 rRNA                           | B, F, P                                                                                  | Based on composition               |         | Time series                                    |

|    |      |               |                                      |                                                  |                                                    |
|----|------|---------------|--------------------------------------|--------------------------------------------------|----------------------------------------------------|
| 32 | 2014 | 454 rRNA      | Similar to B, F, P, F2               | Dirichlet Multinomial Mixtures (4)               | HMP reanalysis                                     |
| 33 | 2014 | 454 rRNA      | B, F, P                              | Complete linkage, Bray-Curtis clustering, SIL(3) | HMP reanalysis                                     |
| 34 | 2014 | qPCR          | B, P                                 | Prevotella to Bacteroides ratio                  | Time series on Food trials                         |
| 35 | 2014 | 454 rRNA      | B, P                                 | Weighted Unifrac SIL(2)                          |                                                    |
| 36 | 2014 | 454 rRNA      | B, Robinsella (Firmicutes dominated) | CH (2)                                           | Wild mice; predictable ET switch after capture     |
| 37 | 2014 | illumina WGS  | B, F, P                              | CH(3), SIL(3)                                    | 4 datasets combined <sup>1,12,38,39</sup>          |
| 40 | 2015 | illumina rRNA | Similar to F, P                      | CH(2)                                            | Gorilla, no association to SIV infection           |
| 41 | 2015 | 454 rRNA      | F, P                                 | CH(2), SIL(2)                                    | Swine, juvenile development into adult enterotypes |
| 42 | 2016 | illumina rRNA | F,B,P                                | JSD clustering (2,3), DMM(4)                     | 3984 Samples from US and Europe                    |

135

136

137 **Supplementary Table 2:** Percentage of CAZY enzymes annotated within 8 substrate categories on a  
 138 selected subset of gut specific bacterial genomes as published in<sup>43</sup>. Bacteroides contains 15 genomes of  
 139 genus Bacteroides, Firmicutes are 104 genomes of phylum Firmicutes and Prevotella contains 3  
 140 genomes of genus Prevotella. Note that due to multiple substrate specificities, percentage do not add  
 141 up to 100%.

| CAZY category                     | Bacteroidetes | Firmicutes | Prevotella |
|-----------------------------------|---------------|------------|------------|
| Plant.Cell.Wall.Carbohydrates     | 50%           | 35%        | 42%        |
| Chitin                            | 0%            | 0%         | 0%         |
| Alpha.glucans                     | 5%            | 20%        | 10%        |
| Animal.Carbohydrates              | 50%           | 28%        | 35%        |
| Bacterial.Cell.Wall.Carbohydrates | 4%            | 23%        | 12%        |
| Fructans                          | 1%            | 4%         | 1%         |
| Fungal.Carbohydrates              | 11%           | 7%         | 9%         |
| Dextran                           | 0%            | 0%         | 0%         |

142

143 **Supplementary Table 3:** Functional differences between 3 different enterotype models: 2 Types  
 144 represents a model comparing ET P against a combined ET F+ ET B, 3 Types compares the three first  
 145 reported enterotypes (ET B, ET F, ET P) and 4 Types are enterotypes as determined by DMM modelling.  
 146 Used gene families are derived from COG<sup>44</sup> and KEGG<sup>45</sup> annotations.

147 **Supplementary Table 4:** Associations between obesity related parameters reported in<sup>13</sup> and ET state,  
 148 split for the 2, 3 and 4 clusters.

149 **Supplementary Table 5:** Studies reporting associations between enterotype drivers and host states

| Study          | Enriched driver | Phenotype                                          |
|----------------|-----------------|----------------------------------------------------|
| 25             | Bacteroides     | Atherosclerosis                                    |
| 46,47          | Bacteroides     | High-fat diet                                      |
| 28             | Prevotella      | CD risk allele                                     |
| 48,49          | Prevotella      | Colitis susceptible mice                           |
| 17,20,50-52    | Prevotella      | Fiber-rich diet                                    |
| 29             | Bacteroides     | NASH and ROS                                       |
| 17,52          | Bacteroides     | Protein & animal fat                               |
| 53             | Bacteroides     | Fibers & fructans                                  |
| 13,23,30,54,55 | Bacteroides     | Low-grade inflammation, CRP and insulin resistance |

150

151

152

153 **Supplementary Figures**

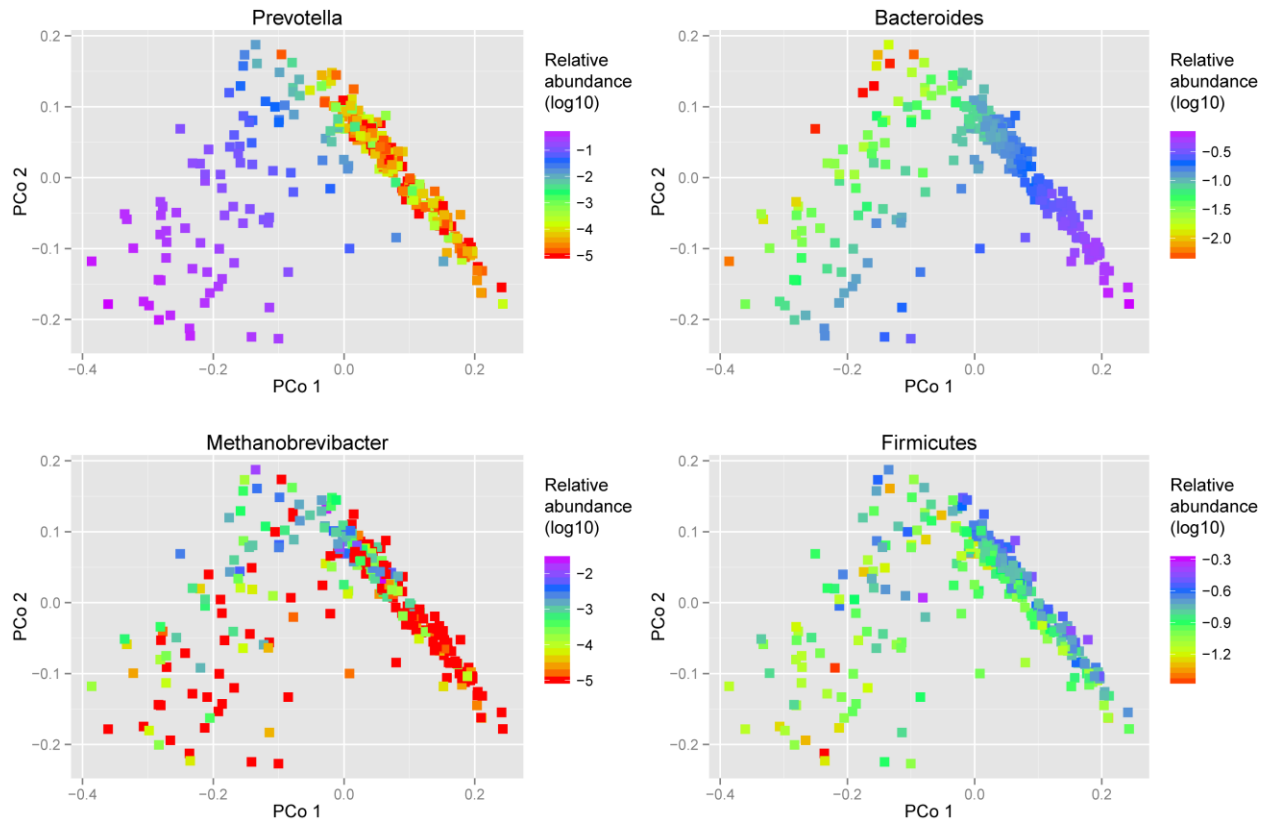

154

155 **Supplementary Figure 1:** Log<sub>10</sub> transformed relative abundance of relevant genera,  
 156 superimposed onto the PCoA ordination of the MetaHIT dataset<sup>13</sup>, consisting of 278 samples,  
 157 showing the bimodal distributions of *Prevotella* and *Methanobrevibacter* and the unimodal  
 158 distribution of *Bacteroides* and *Firmicutes*, similar to Fig. 2A and 3A where the modality can be  
 159 more clearly seen based on density distributions.

160

161

162

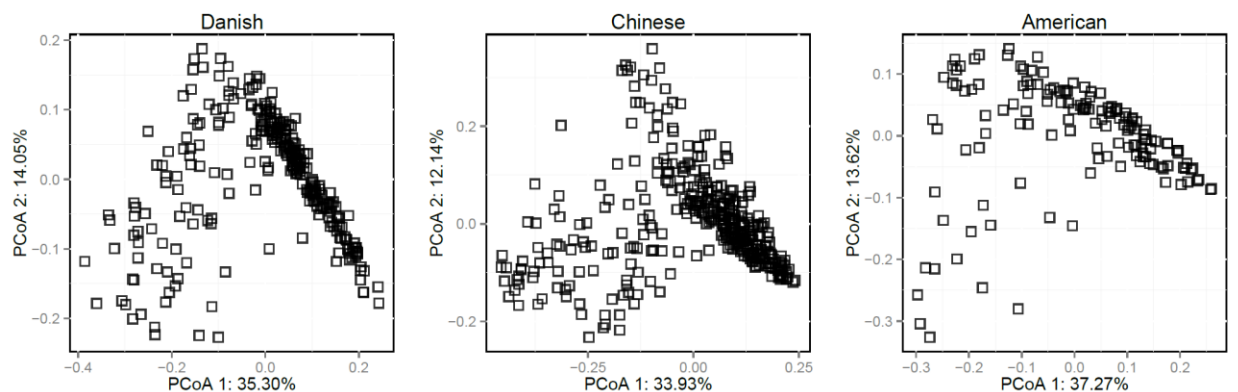

163



164 **Supplementary Figure 2:** PCoA of three datasets (Danish represented by MetaHit<sup>13</sup> (278  
 165 samples), Chinese<sup>12</sup> (368 samples) and American by HMP<sup>1</sup> (142 samples)), on a Jensen-Shannon  
 166 distance computed on the genus abundance profiles of the samples. In all cases, the samples  
 167 are not randomly distributed throughout the space, with similar higher density regions.

168

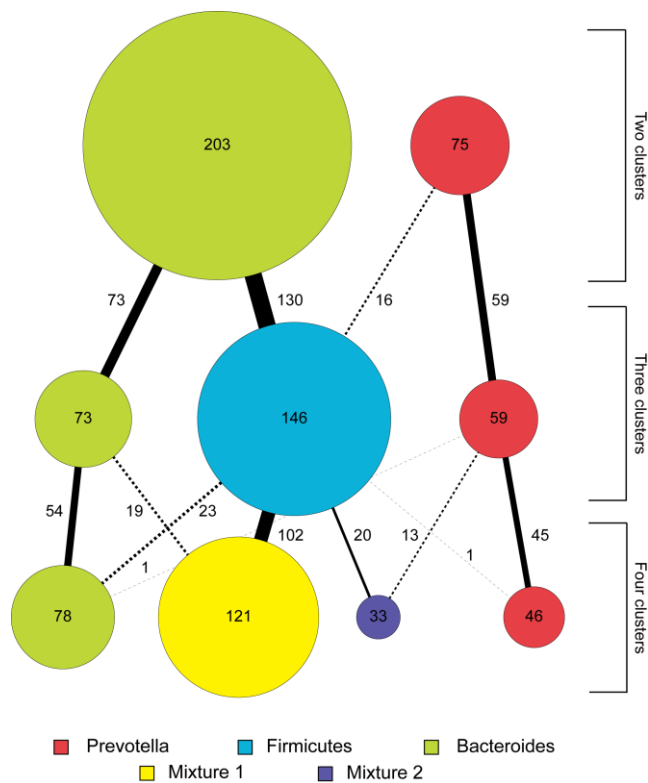

169

170 **Supplementary Figure 3:** Hierarchical structure of different clusterings using 278 MetaHIT<sup>13</sup>  
 171 samples. Each circle represents a cluster, as obtained by PAMk for 2 and 3 clusters and DMM  
 172 for 4 clusters. The connecting lines show the number of samples that overlap between the  
 173 cluster definitions. Overall, the different clusterings are highly associated, forming a hierarchical  
 174 structure.

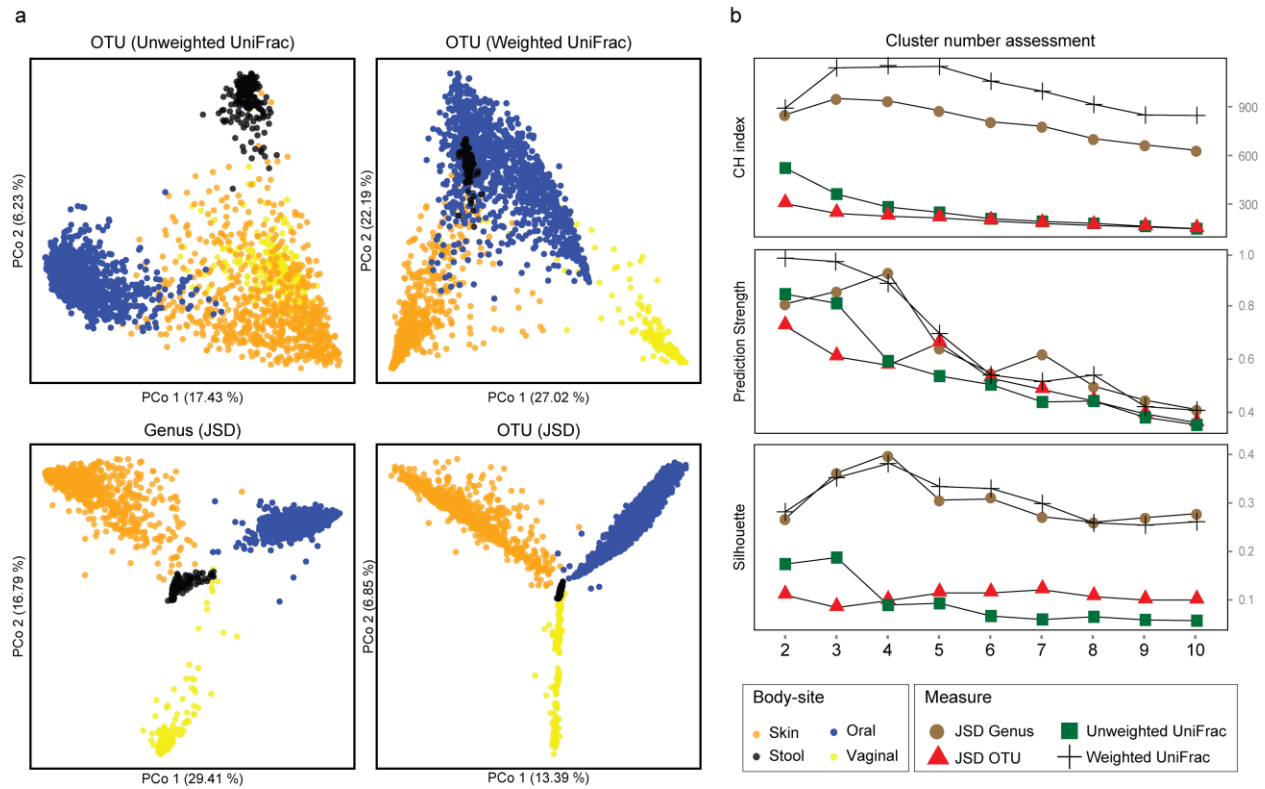

175

176 **Supplementary Figure 4:** Clustering of human body sites, based on the genus level abundance  
 177 of 2381 HMP samples. Body-site separation as in Fig. 1, using frequently used enterotype  
 178 clustering methods. (A) Ordination of the HMP 16S rRNA (v35) dataset using four common  
 179 inter-sample distance measures. (B) The optimal cluster number calculated within each  
 180 distance measure using common clustering optimality measures. Body site separation was  
 181 recovered by Jensen Shannon divergence (JSD) distance and weighted UniFrac.

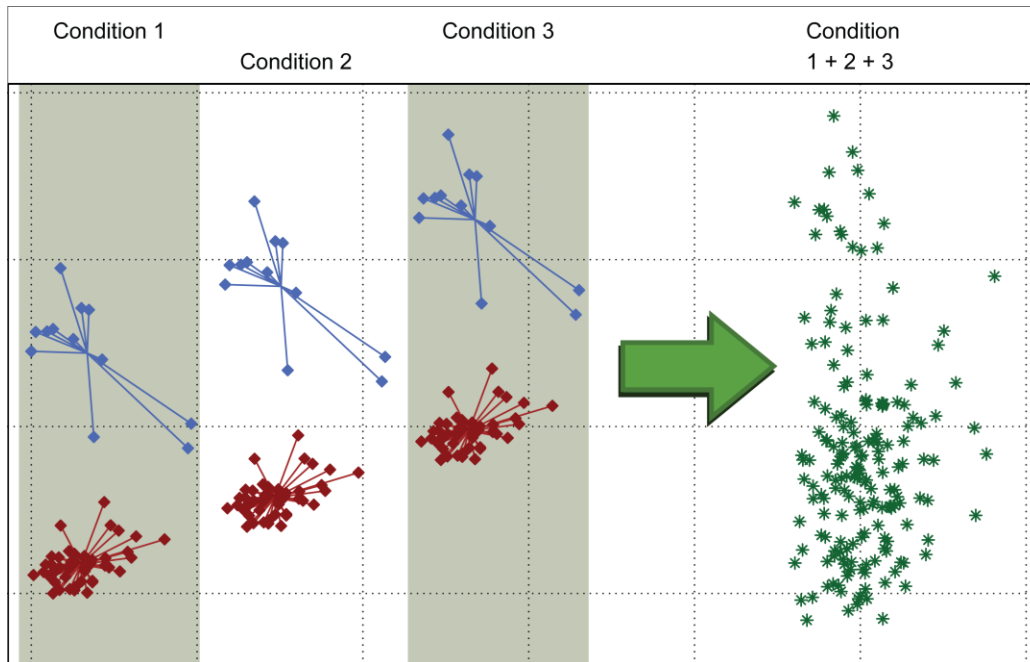

182

183 **Supplementary Figure 5:** Systematic shifts in the microbiota composition under different  
 184 conditions can obscure clusters in the data. In this theoretical example, the discrete mouse  
 185 enterotypes F and B, represented as red and blue data points, respectively (60 samples; original  
 186 data from publication<sup>30</sup>). These were linearly shifted on the y-axis, representing three  
 187 hypothetical confounders acting on the microbiome. When combining these three conditions  
 188 (green points), the discrete clustering is no longer observable. Such a systematic confounder  
 189 that shifts all samples within each of the three exemplarily conditions, could for example be the  
 190 immune system or different diets, as well as technical biases, such as different DNA extraction  
 191 methods. For example, in the mouse microbiota<sup>30</sup> a discrete separation between ET F and ET B  
 192 is possible. Due to the design of this study, more factors were controlled for than possible in  
 193 human studies, like diet and environment. Thus, this figure illustrates how confounders may  
 194 impact the observed composition space and the clustering of samples therein.

195

196

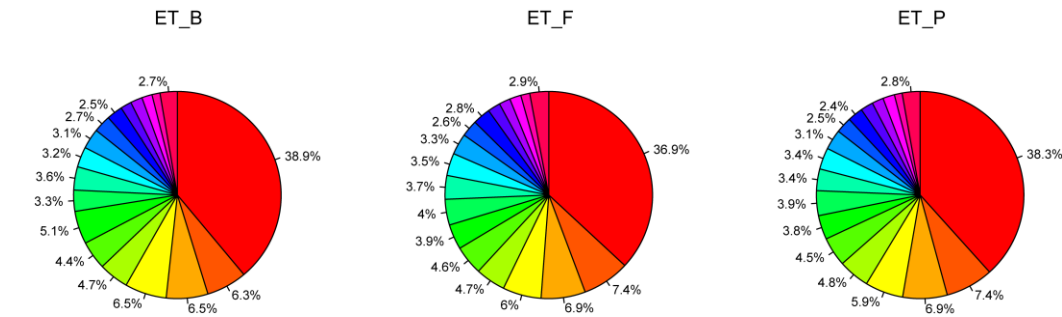

COGs

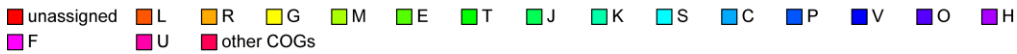

197

198 **Supplementary Figure 6:** Although 23/25 eggNOG categories are significantly different between  
 199 three enterotypes defined on the 278 MetaHIT<sup>13</sup> samples (table S3), the overall composition  
 200 remains relatively stable between them, due to consistently small effect size differences  
 201 between enterotypes in their functional composition, which is more stable than the taxonomic  
 202 composition.

203

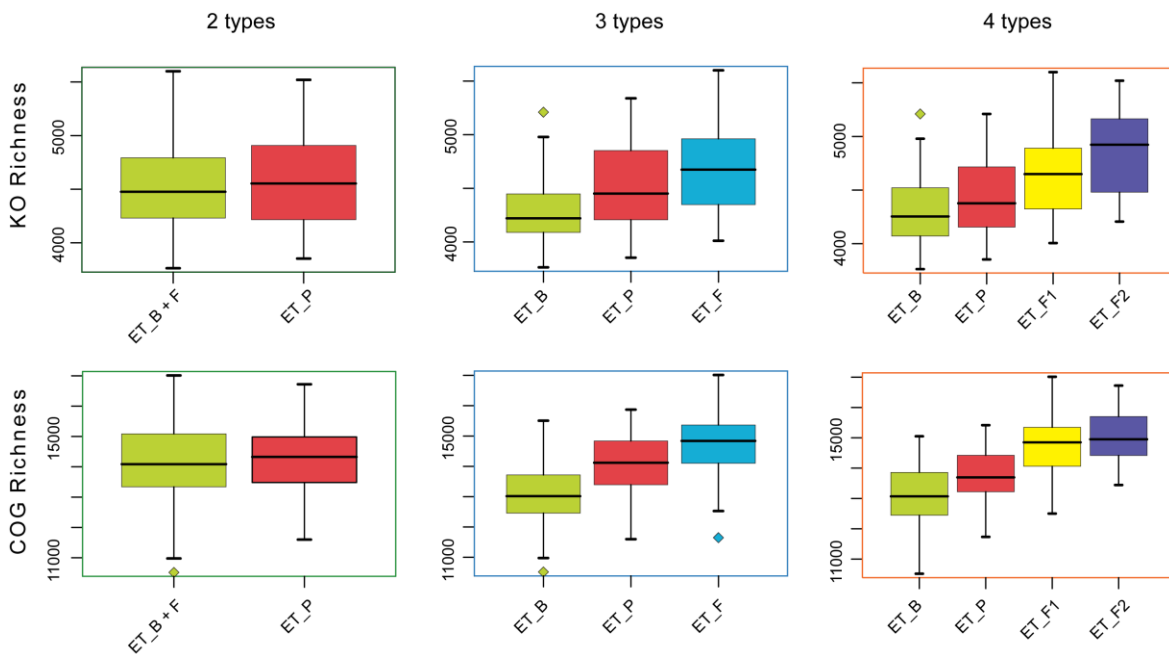

204

205 **Supplementary Figure 7:** Functional richness differs substantially between enterotypes defined  
 206 on the MetaHIT dataset (278 samples), as measured on COG<sup>44</sup> and KO<sup>45</sup> level data. Boxes  
 207 represent the 25th to 75th quantiles, and whiskers extend to 1.5x the interquartile range.

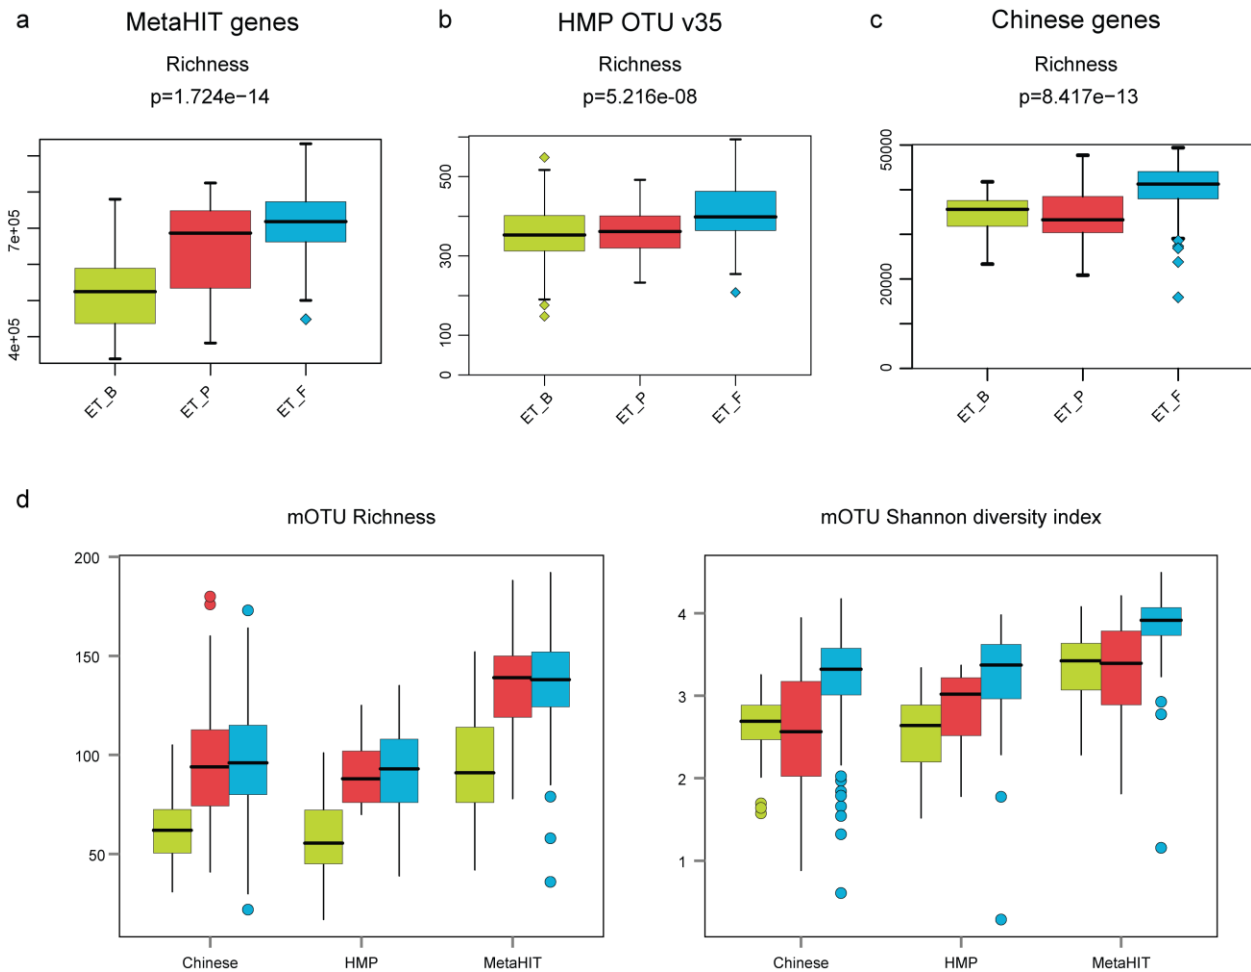

208

209 **Supplementary Figure 8:** ET richness differences calculated on (a) 278 MetaHIT samples<sup>13</sup>, (b)  
 210 142 HMP samples<sup>1</sup> and (b) 368 Chinese samples<sup>12</sup>. Boxes represent the 25th to 75th quantiles,  
 211 and whiskers extend to 1.5x the interquartile range. High consistency in diversity distribution  
 212 between enterotypes is visible, despite the underlying data being different community profiling  
 213 techniques: MetaHIT and Chinese samples are gene richness estimates derived from a gene  
 214 catalog that encompasses functional as well as taxonomic diversity, while HMP richness was  
 215 estimated based on v35 16S rRNA gene OTUs, thus only representing taxonomic diversity.  
 216 Further, using the marker genes based mOTU approach<sup>2</sup> to calculate richness and diversity,  
 217 similar trends could be derived (d).

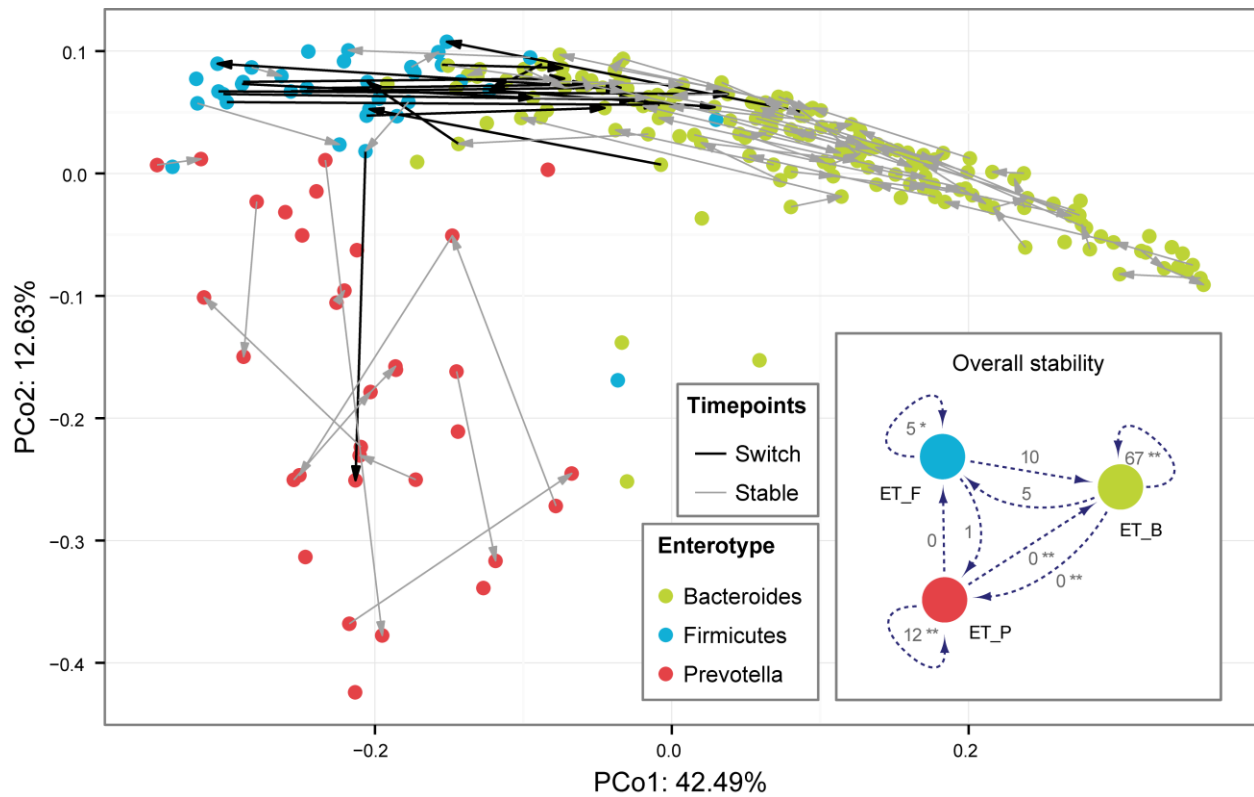

218

219 **Supplementary Figure 9:** Stability of enterotypes: Considering 100 HMP individuals sampled  
 220 with metabarcoding (16S) at two different time points, roughly 200 days apart, we illustrate  
 221 their enterotype stability in PCoA projection. Samples from the same individual are connected  
 222 through a line, with the arrow pointing to the later sample. Significance of stability is assessed  
 223 through a permutation test and illustrated in the bottom right panel (\*  $p < 0.05$ , \*\*  $p < 0.01$ ).  
 224 The insert "Overall stability" describes the number of samples that were switching between  
 225 time points or remained within the same enterotype.

226

227

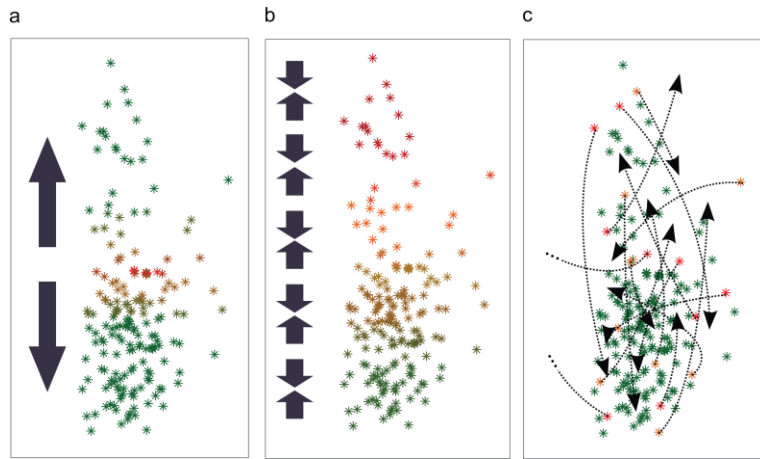

228

229 **Supplementary Figure 10:** Three hypotheses that could account for the observed enterotype  
 230 gradient in temporal data: (A) the Bacteroides/Firmicutes gradient could be driven by 2 global  
 231 optimal states or (B) temporal samples are auto correlating to an optimum specified by each  
 232 microbiota individually, but not driven by global attractors. Last, (C) the Bacteroides/Firmicutes  
 233 gradient does not reflect an ecological pattern and is subject to strong temporal changes, but  
 234 this is unlikely to apply to most samples.

235

236

237

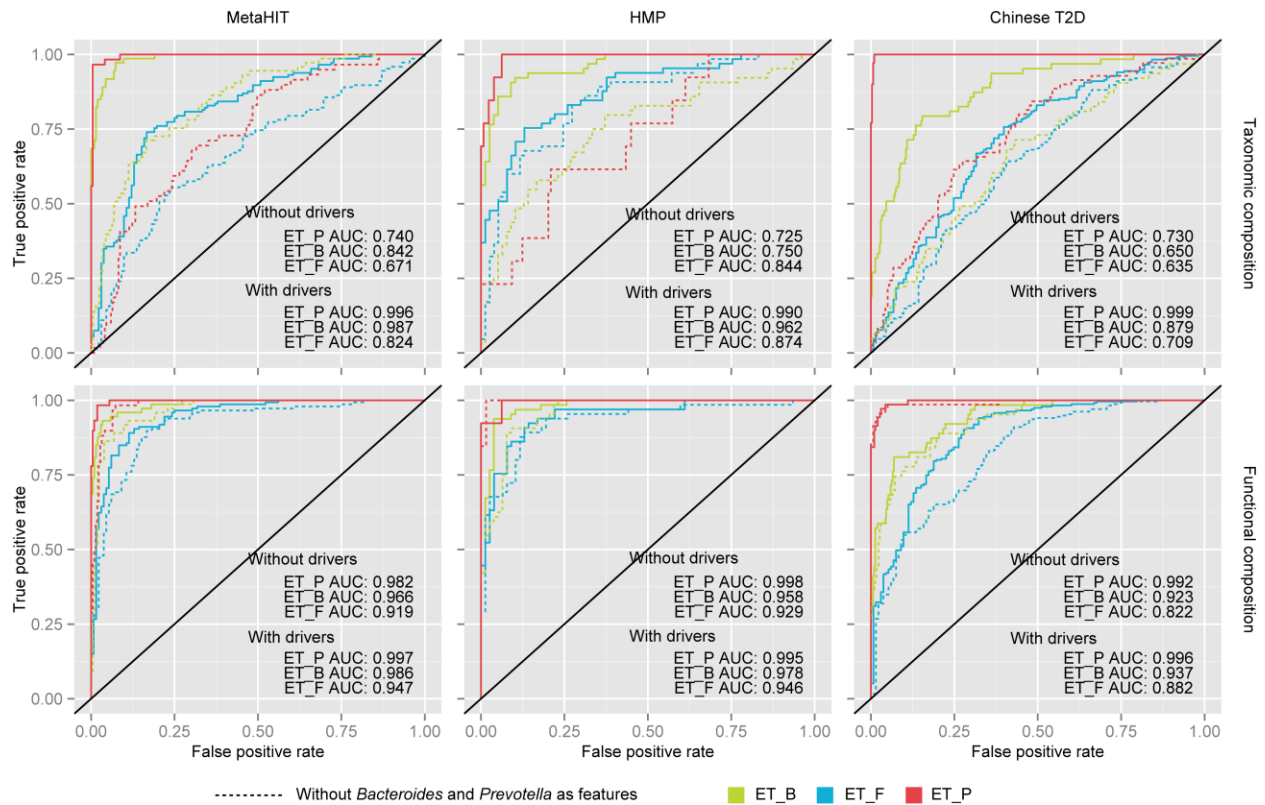

238

239 **Supplementary Figure 11:** Robust classification of enterotypes across studies. A three  
 240 enterotype model classifier was trained on log-ratio transformed genus level abundances of the  
 241 278 MetaHIT<sup>13</sup> metagenomic samples in order to address possible compositional effects. This  
 242 model is shown to also recover enterotypes in 142 HMP samples as well as 368 Chinese  
 243 samples. The receiver operating characteristic area under the curve (ROC-AUC) for classifier  
 244 performance on the MetaHIT (internal cross-validation), Chinese and HMP datasets are shown,  
 245 with the clustering ground truth being estimated using unsupervised clustering of samples in  
 246 the respective dataset. Although there are known batch effects between these datasets<sup>38</sup>, the  
 247 properties of the enterotypes are comparable and recoverable. Furthermore, the classification  
 248 is possible even when removing the genera *Bacteroides* and *Prevotella* from the feature set  
 249 (labelled “Without drivers”). The classification of enterotypes on functional (COG) abundances  
 250 in almost all cases outperforms the taxonomic classification across all three datasets. In the  
 251 functional context, “Without drivers” represents a dataset where COGs that contain a gene  
 252 from either the *Bacteroides* or *Prevotella* genus were removed prior to training and subsequent  
 253 classification.

254

255

256



## 257 Supplementary References

- 258 1. Huttenhower, C. *et al.* Structure, function and diversity of the healthy human microbiome.  
259 *Nature* **486**, 207–214 (2012).
- 260 2. Sunagawa, S. *et al.* Metagenomic species profiling using universal phylogenetic marker genes.  
261 *Nat. Methods* **10**, 1196–1199 (2013).
- 262 3. Kultima, J. R. *et al.* MOCAT: a metagenomics assembly and gene prediction toolkit. *PLoS One* **7**,  
263 e47656 (2012).
- 264 4. Voigt, A. Y. *et al.* Temporal and technical variability of human gut metagenomes. *Genome Biol.*  
265 **16**, 73 (2015).
- 266 5. Hennig, C. fpc: Flexible procedures for clustering. (2014).
- 267 6. Calinski, T. & Harabasz, J. A dendrite method for cluster analysis. *Commun. Stat. - Theory*  
268 *Methods* **3**, 1–27 (1974).
- 269 7. Rousseeuw, P. J. Silhouettes: A graphical aid to the interpretation and validation of cluster  
270 analysis. *J. Comput. Appl. Math.* **20**, 53–65 (1987).
- 271 8. Tibshirani, R. & Walther, G. Cluster Validation by Prediction Strength. *J. Comput. Graph. Stat.* **14**,  
272 511–528 (2005).
- 273 9. Saary, P., Forslund, K., Bork, P. & Hildebrand, F. RTK: efficient rarefaction analysis of large  
274 datasets. *Bioinformatics* 1–2 (2017). doi:10.1093/bioinformatics/btx206
- 275 10. Driver, H. E. & Kroeber, A. L. Quantitative expression of cultural relationships. *Univ. California*  
276 *Publ. Am. Archeol. Ethnol.* **31**, 211–256 (1932).
- 277 11. Lozupone, C. & Knight, R. UniFrac: a new phylogenetic method for comparing microbial  
278 communities. *Appl. Environ. Microbiol.* **71**, 8228–8235 (2005).
- 279 12. Qin, J. *et al.* A metagenome-wide association study of gut microbiota in type 2 diabetes. *Nature*  
280 **490**, 55–60 (2012).
- 281 13. Le Chatelier, E. *et al.* Richness of human gut microbiome correlates with metabolic markers.  
282 *Nature* **500**, 541–546 (2013).
- 283 14. Arumugam, M. *et al.* Enterotypes of the human gut microbiome. *Nature* **473**, 174–80 (2011).
- 284 15. Tibshirani, R. Regression Selection and Shrinkage via the Lasso. *Journal of the Royal Statistical*  
285 *Society B* **58**, 267–288 (1994).
- 286 16. Morotomi, N. *et al.* Evaluation of Intestinal Microbiotas of Healthy Japanese Adults and Effect of  
287 Antibiotics Using the 16S Ribosomal RNA Gene Based Clone Library Method. *Biol. Pharm. Bull.* **34**,  
288 1011–20 (2011).
- 289 17. Wu, G. D. *et al.* Linking long-term dietary patterns with gut microbial enterotypes. *Science* **334**,  
290 105–8 (2011).
- 291 18. Zupancic, M. L. *et al.* Analysis of the Gut Microbiota in the Old Order Amish and Its Relation to

- 292 the Metabolic Syndrome. *PLoS One* **7**, e43052 (2012).
- 293 19. Zhou, J. *et al.* Functional molecular ecological networks. *MBio* **1**, (2010).
- 294 20. Yatsunenko, T. *et al.* Human gut microbiome viewed across age and geography. *Nature* **486**, 222–  
295 7 (2012).
- 296 21. Huse, S. M., Ye, Y., Zhou, Y. & Fodor, A. a. A core human microbiome as viewed through 16S rRNA  
297 sequence clusters. *PLoS One* **7**, e34242 (2012).
- 298 22. Koren, O. *et al.* A Guide to Enterotypes across the Human Body: Meta-Analysis of Microbial  
299 Community Structures in Human Microbiome Datasets. *PLoS Comput. Biol.* **9**, e1002863 (2013).
- 300 23. Claesson, M. J. *et al.* Gut microbiota composition correlates with diet and health in the elderly.  
301 *Nature* **488**, 178–84 (2012).
- 302 24. Jeffery, I. B., Claesson, M. J., O’Toole, P. W. & Shanahan, F. Categorization of the gut microbiota:  
303 enterotypes or gradients? *Nat. Rev. Microbiol.* **10**, 591–592 (2012).
- 304 25. Karlsson, F. H. *et al.* Symptomatic atherosclerosis is associated with an altered gut metagenome.  
305 *Nat. Commun.* **3**, 1245 (2012).
- 306 26. Holmes, I., Harris, K. & Quince, C. Dirichlet Multinomial Mixtures: Generative Models for  
307 Microbial Metagenomics. *PLoS One* **7**, e30126 (2012).
- 308 27. Moeller, A. H. *et al.* Chimpanzees and humans harbour compositionally similar gut enterotypes.  
309 *Nat. Commun.* **3**, 1179 (2012).
- 310 28. Quince, C. *et al.* The impact of Crohn’s disease genes on healthy human gut microbiota: a pilot  
311 study. *Gut* **0**, 2012–2014 (2013).
- 312 29. Zhu, L. *et al.* Characterization of gut microbiomes in nonalcoholic steatohepatitis (NASH)  
313 patients: A connection between endogenous alcohol and NASH. *Hepatology* **57**, 601–9 (2013).
- 314 30. Hildebrand, F. *et al.* Inflammation-associated enterotypes, host genotype, cage and inter-  
315 individual effects drive gut microbiota variation in common laboratory mice. *Genome Biol.* **14**, R4  
316 (2013).
- 317 31. Mardanov, A. V *et al.* Metagenomic Analysis of the Dynamic Changes in the Gut Microbiome of  
318 the Participants of the MARS-500 Experiment, Simulating Long Term Space Flight. *Acta Naturae*  
319 **5**, 116–125 (2013).
- 320 32. Ding, T. & Schloss, P. D. Dynamics and associations of microbial community types across the  
321 human body. *Nature* (2014). doi:10.1038/nature13178
- 322 33. Zhou, Y. *et al.* Exploration of bacterial community classes in major human habitats. *Genome Biol.*  
323 **15**, R66 (2014).
- 324 34. Roager, H. M., Licht, T. R., Poulsen, S. K., Larsen, T. M. & Bahl, M. I. Microbial enterotypes,  
325 inferred by the prevotella-to-bacteroides ratio, remained stable during a 6-month randomized  
326 controlled diet intervention with the new nordic diet. *Appl. Environ. Microbiol.* **80**, 1142–9  
327 (2014).

- 328 35. Zhang, J. *et al.* Mongolians core gut microbiota and its correlation with seasonal dietary changes.  
329 *Sci. Rep.* **4**, 5001 (2014).
- 330 36. Wang, J. *et al.* Dietary history contributes to enterotype-like clustering and functional  
331 metagenomic content in the intestinal microbiome of wild mice. *Proc. Natl. Acad. Sci. U. S. A.*  
332 **111**, E2703-10 (2014).
- 333 37. Karlsson, F. H., Nookaew, I. & Nielsen, J. Metagenomic Data Utilization and Analysis (MEDUSA)  
334 and Construction of a Global Gut Microbial Gene Catalogue. *PLoS Comput. Biol.* **10**, e1003706  
335 (2014).
- 336 38. Karlsson, F. H. *et al.* Gut metagenome in European women with normal, impaired and diabetic  
337 glucose control. *Nature* **498**, 99–103 (2013).
- 338 39. Qin, J. *et al.* A human gut microbial gene catalogue established by metagenomic sequencing.  
339 *Nature* **464**, 59–65 (2010).
- 340 40. Moeller, A. H. *et al.* Stability of the gorilla microbiome despite simian immunodeficiency virus  
341 infection. *Mol. Ecol.* **24**, 690–697 (2015).
- 342 41. Mach, N. *et al.* Early-life establishment of the swine gut microbiome and impact on host  
343 phenotypes. *Environ. Microbiol. Rep.* **7**, 554–569 (2015).
- 344 42. Falony, G. *et al.* Population-level analysis of gut microbiome variation. *Science (80-. ).* **352**, 560–  
345 564 (2016).
- 346 43. Kaoutari, A. El, Armougom, F., Gordon, J. I., Raoult, D. & Henrissat, B. The abundance and variety  
347 of carbohydrate-active enzymes in the human gut microbiota. *Nat. Rev. Microbiol.* **11**, 497–504  
348 (2013).
- 349 44. Tatusov, R. L., Koonin, E. V & Lipman, D. J. A genomic perspective on protein families. *Science*  
350 **278**, 631–7 (1997).
- 351 45. Kanehisa, M. & Goto, S. KEGG: kyoto encyclopedia of genes and genomes. *Nucleic Acids Res.* **28**,  
352 27–30 (2000).
- 353 46. Hildebrandt, M. A. *et al.* High-fat diet determines the composition of the murine gut microbiome  
354 independently of obesity. *Gastroenterology* **137**, 1716-24–2 (2009).
- 355 47. Turnbaugh, P. J. *et al.* A core gut microbiome in obese and lean twins. *Nature* **457**, 480–4 (2009).
- 356 48. Elinav, E. *et al.* NLRP6 inflammasome regulates colonic microbial ecology and risk for colitis. *Cell*  
357 **145**, 745–57 (2011).
- 358 49. Brinkman, B. M. *et al.* Caspase deficiency alters the murine gut microbiome. *Cell Death Dis.* **2**,  
359 e220 (2011).
- 360 50. De Filippo, C. *et al.* Impact of diet in shaping gut microbiota revealed by a comparative study in  
361 children from Europe and rural Africa. *Proc. Natl. Acad. Sci. U. S. A.* **107**, 14691–6 (2010).
- 362 51. Ou, J. *et al.* Diet, microbiota, and microbial metabolites in colon cancer risk in rural Africans and  
363 African Americans. *Am. J. Clin. Nutr.* **98**, 111–20 (2013).

- 364 52. David, L. A. *et al.* Diet rapidly and reproducibly alters the human gut microbiome. *Nature* (2013).  
365 doi:10.1038/nature12820
- 366 53. Sonnenburg, E. D. *et al.* Specificity of polysaccharide use in intestinal bacteroides species  
367 determines diet-induced microbiota alterations. *Cell* **141**, 1241–52 (2010).
- 368 54. Rath, H. & Herfarth, H. Normal luminal bacteria, especially *Bacteroides* species, mediate chronic  
369 colitis, gastritis, and arthritis in HLA-B27/human beta2 microglobulin transgenic rats. *J. Clin. ...*  
370 945–953 (1996).
- 371 55. Bloom, S. M. *et al.* Commensal *Bacteroides* species induce colitis in host-genotype-specific  
372 fashion in a mouse model of inflammatory bowel disease. *Cell Host Microbe* **9**, 390–403 (2011).
- 373
